# Supplementary material
Source: Springer Nature journal article supplement (https://www.springermedizin.de/resource/supplementary/13019_2011_427_MOESM3_ESM.pdf/9638662)

## Pre-operative

REALME, MARVIN ARMAND JOSEP  
MRN 2357619  
Gender M  
Acc# 4798546  
DOB 1944-03-03  
2006-10-31  
10:20:44  
No.61

ST MICHAEL'S HOSPITAL  
CT01\_OCB

?

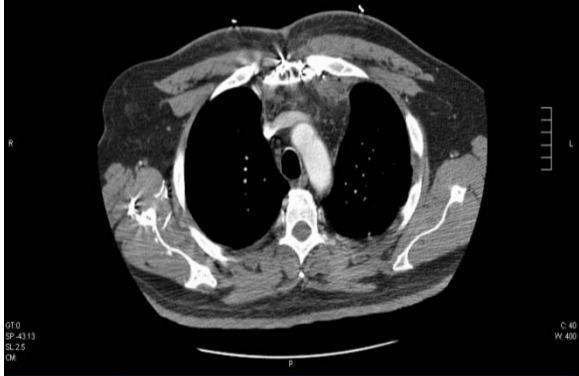

## Post-operative

REALME, MARVIN ARMAND JOSEP  
MRN 2357619  
Gender M  
Acc# 5133860  
DOB 1944-03-03  
2007-09-26  
14:31:20  
No.94

ST MICHAEL'S HOSPITAL  
CT01\_OCB

?

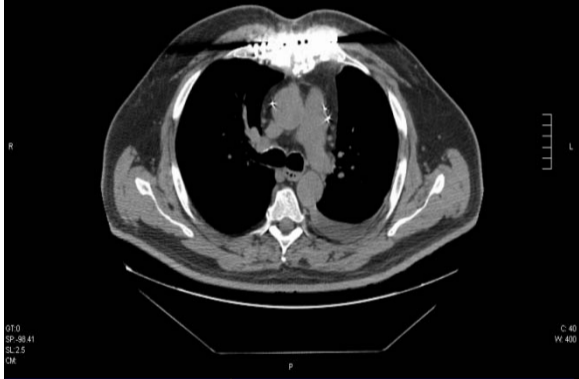

Supplement: MOESM3 [file 9638662]
